# Supplementary material
Source: PubMed Central journal article supplement (PMC518845)

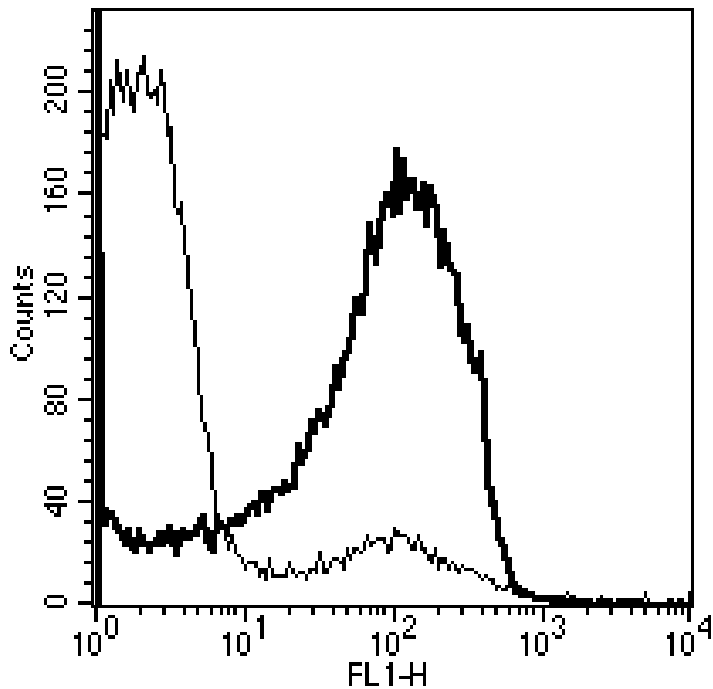

Supplement: pnas_101_38_13867__1.pdf [file pnas_101_38_13867__1.pdf]

**A**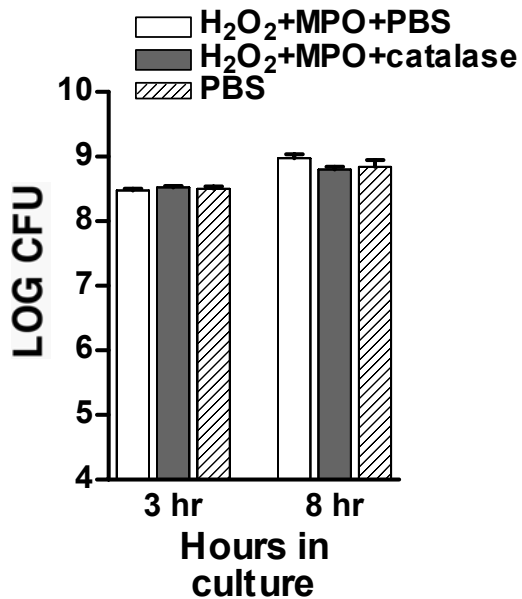**B**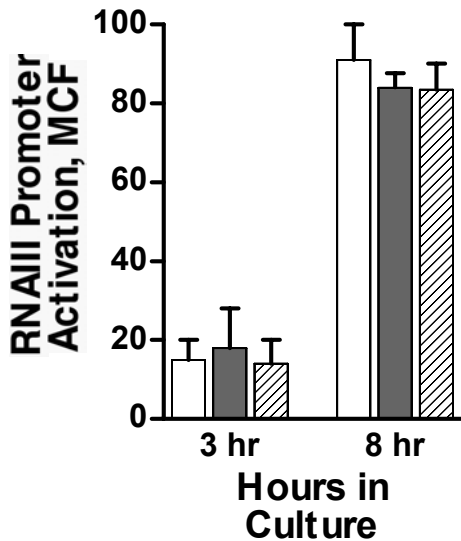

Supplement: pnas_101_38_13867__2.pdf [file pnas_101_38_13867__2.pdf]

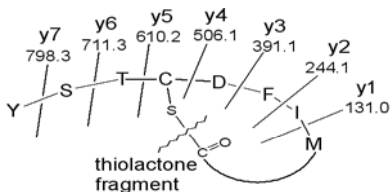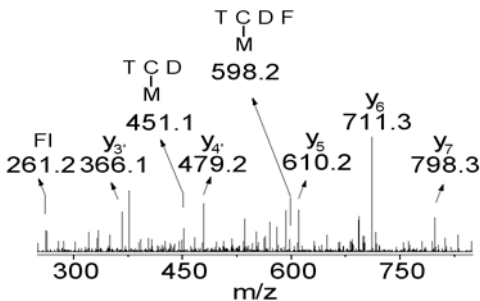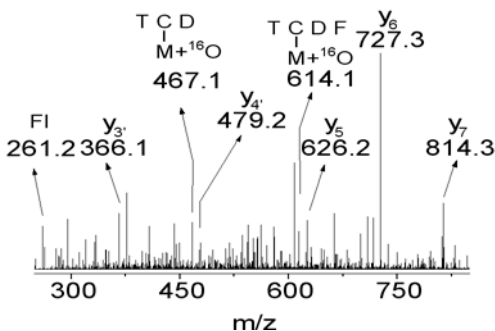

Supplement: pnas_101_38_13867__3.pdf [file pnas_101_38_13867__3.pdf]
